# Supplementary material for: Gastrointestinal Digestion Model Assessment of Peptide Diversity and Microbial Fermentation Products of Collagen Hydrolysates
Source: MDPI journal article supplement (doi:10.3390/nu13082720), 2021-08-07
Supplement: s1 [file s1]

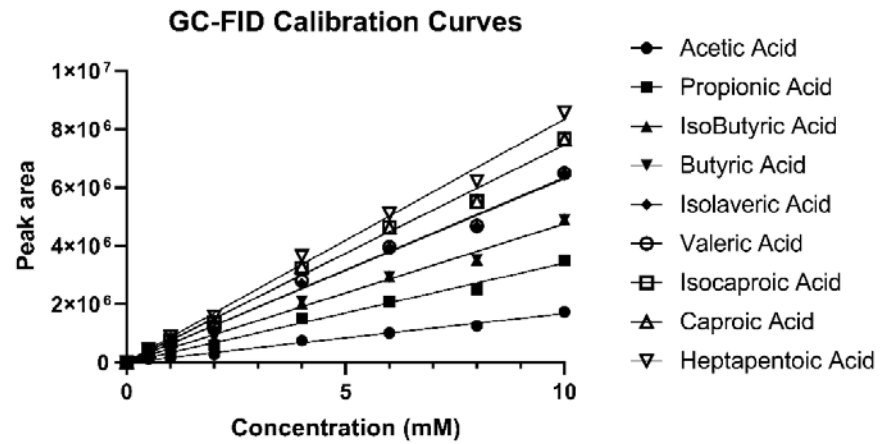

**Figure S1.** SCFA and BCFA standard curves based on peak area and concentration. Linearity was assessed using  $R^2$ ; all were above 0.99.

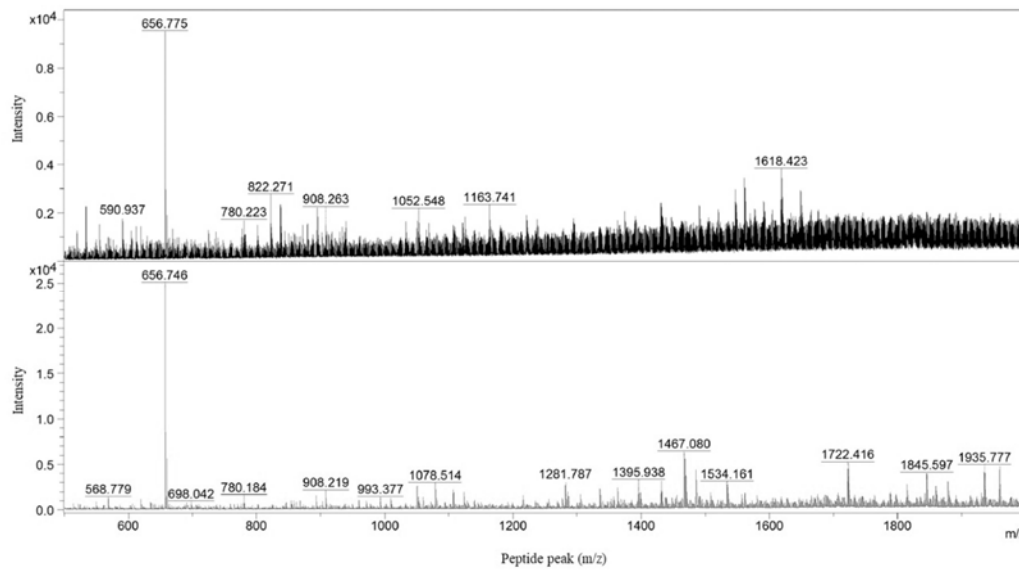

**Figure S2.** Peptide profile and content. Lower molecular mass chromatograms (500-2000 m/z) of CHs before upper GI digestion. Top chromatogram CH-GL, bottom chromatogram CH-OPT.

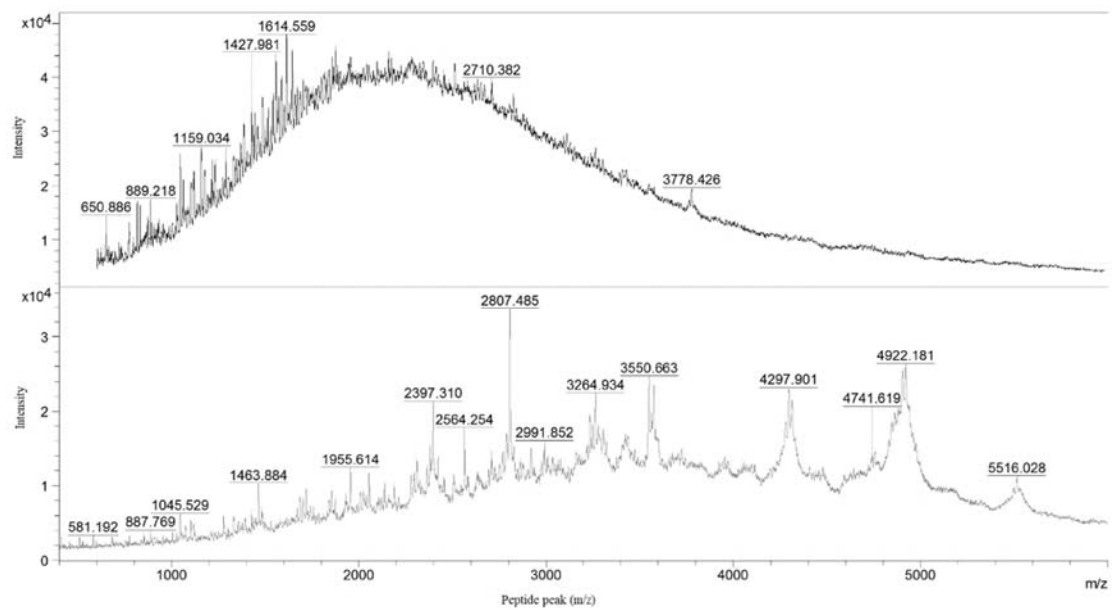

**Figure S3.** Peptide profile and content. Higher molecular mass chromatograms (100-5000 m/z) of CHs before upper GI digestion. Top chromatogram CH-GL, bottom chromatogram CH-OPT.

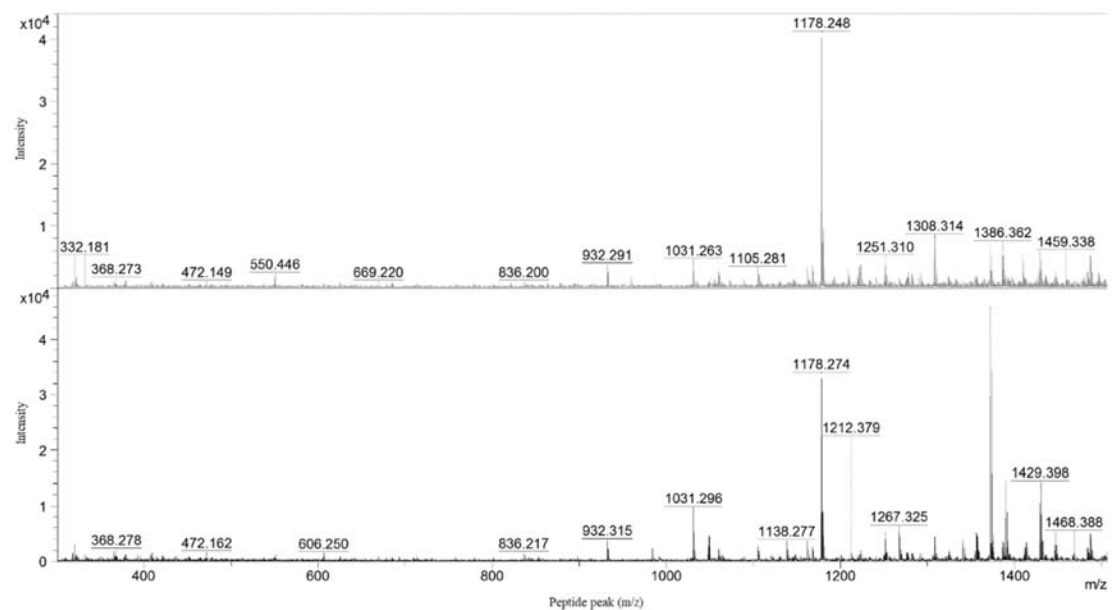

**Figure S4.** Peptide profile and content. Lower molecular mass chromatograms (300-1500 m/z) of CHs after upper GI digestion. Top chromatogram CH-GL, bottom chromatogram CH-OPT.

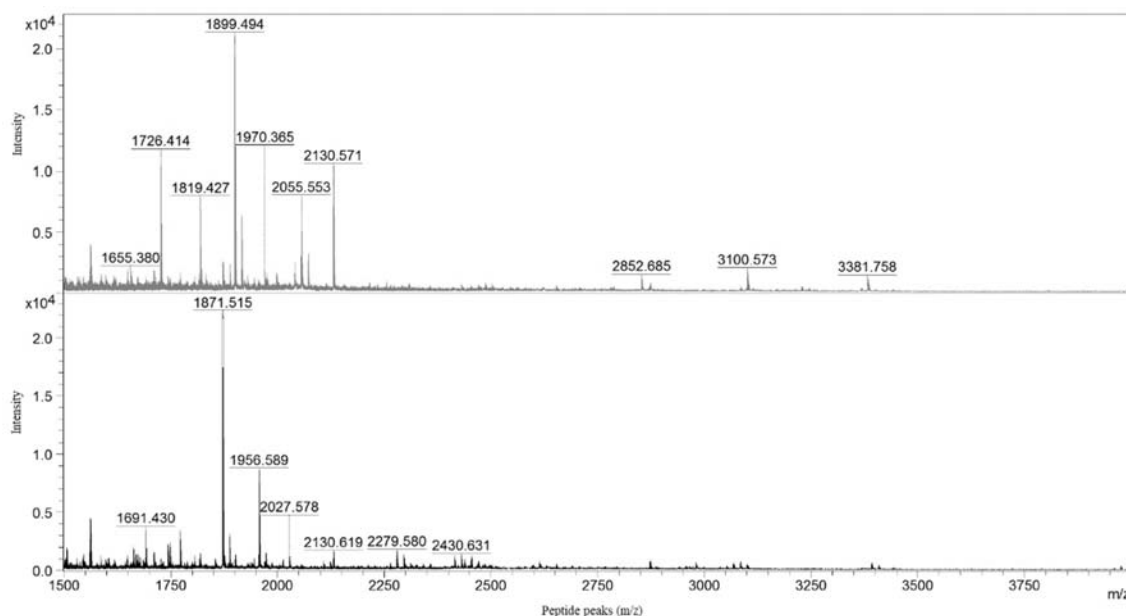

**Figure S5.** Peptide profile and content. Higher molecular mass chromatograms (1500-4000 m/z) of CHs after upper GI digestion. Top chromatogram CH-GL, bottom chromatogram CH-OPT.

**Table S1.** List of the peptide sequences from CH-GL and CH-OPT before upper intestinal digestion. Each letter is indicative of an amino acid.

| Peptide Sequences      |                  |                  |
|------------------------|------------------|------------------|
| CH-GL                  | CH-OPT           | Shared sequences |
| AAGPTGPIGSR            | AGPAGPAGPAGPR    | AGPSGPAGPTGAR    |
| AGPPGADGQPGAK          | GPAGPAGPAGPR     | GPAGPAGPRG       |
| AGPSGPSGLPGER          | GPAGPAGPAGPRG    | GRPGPIGPA        |
| AGPSGPSGLPGERG         | GPAGPQGPR        |                  |
| AIGSPGAGKD             | GPAGPQGPRG       |                  |
| ARGSDGSVGPVGPA         | GPMGPGSPRG       |                  |
| AVGPAGKDGEAGAQ         | GPRGPSGPQG       |                  |
| AVGPAGPRGPAGPSGPAGKDGR | GPVGAPGRP        |                  |
| AVGPRGPSGPQG           | GPVGAPGRPG       |                  |
| DGAPGKDGVRG            | GSPGPQGPPGSIGPQ  |                  |
| FDGDFYR                | GSPGPQGPPGSIGPQG |                  |
| FSGLDGAKGD             | PAGPQGPRG        |                  |
| GAAGPTGPIGSR           | SGPPGPPGPA       |                  |
| GADGAPGKDGVRG          | SPGPQGPPGSIGPQ   |                  |
| GADGAPGKDGVRGL         | VGSPGPAGPRG      |                  |
| GDRGEAGPAGPAGPAGPR     | VPGPMGPGSPR      |                  |
| GDRGETGPAGPA           | VPGPMGPGSPRG     |                  |
| GDRGETGPAGPAGPIGPVGAR  |                  |                  |
| GDRGETGPAGPS           |                  |                  |
| GEGGPQGPRGS            |                  |                  |
| GEGGPQGPRGSEGPQG       |                  |                  |
| GEPGKQGPSGASGE         |                  |                  |

|                          |
|--------------------------|
| GERGEQGPA                |
| GERGFPGLPGPS             |
| GGPQGPRGSEGPQG           |
| GKDGEAGAQQPPGPAGPA       |
| GKSGDRGETGPAGPA          |
| GKSGDRGETGPAGPAGPIGPV    |
| GKSGDRGETGPAGPAGPIGPVG   |
| GKSGDRGETGPAGPAGPIGPVGAR |
| GPAGKSGDRGETGPAGP        |
| GPAGPSGPAGKDGR           |
| GPIGPVGAR                |
| GPQGPPGSIGPQ             |
| GPQGPPGSIGPQG            |
| GPSGLPGERG               |
| GPTGPIGSR                |
| GPVGPSGPPGKD             |
| GQGDPRPGIPA              |
| IDGRPGPIGPA              |
| IGPSGPAGKD               |
| IQGPPGPAGEEGKRG          |
| ISVPGPMGPPSGPR           |
| LDGAKGDAGPAGPK           |
| LGPVGNPGPAGPAGPR         |
| LMGPRGPPG                |
| PGDKGEAGPSGPAGPTGA       |
| PGPAGPAGPR               |
| QGDPRPGIPA               |
| RGPRGDQGPVGR             |
| SGDRGETGPAGPA            |
| SGDRGETGPAGPS            |
| TAGPSGPSGLPGERG          |
| TGPAGPAGPIGPVGAR         |
| VGPAGPRGPA               |
| VGPAGPRGPAGPS            |
| VGPAGPRGPAGPSGPAGKDGR    |
| VGPRGPSGPQG              |
| VMGPAGSRG                |
| VQGPPGPAGPR              |
| VQGPPGRPGPQ              |
| VVGLPGQR                 |

**Table S2.** List of the peptide sequences from CH-GL and CH-OPT after upper intestinal digestion.

| Peptide Sequences                        |                         |                                     |
|------------------------------------------|-------------------------|-------------------------------------|
| CH-GL                                    | CH-OPT                  | Shared Sequences                    |
| AAGPPGPTGPAGPPGFP GAVGAK                 | AAGEPGKAGER             | AAGAPGPQGPVGPVGK                    |
| AAGPPGPTGPAGPPGFP GAVGAKGE<br>GGPQGPR    | AAGEPGKNGAK             | AAGLPGVAGAPGLPGPR                   |
| AFLSIHS                                  | AAGLPGPKGDRGDAGPK       | AGAPGAPGSQGAPGLQG<br>MPGER          |
| AGPPGLLGPPGPR                            | AAGPSGNLPGASR           | AGAPGPQGPVGPVGK                     |
| AGPPGPTGPAGPPGFPG                        | AAGPTGPIGSR             | AGEAGKPGER                          |
| ANGIPGPIGPPGPR                           | AAGPTGPIGSRG            | AGLPGVAGAPGLPGPR                    |
| APGAPGPVGA                               | AAGQPGAKGER             | AGPPGFPGAPGPK                       |
| AVGPAGAVGPR                              | ADGPAGAPGTPGPQG         | AGPPGPTGPAGPPGFPGA<br>VGAK          |
| DARPNWPWQ                                | AGAPGIPGGK              | AGPPGPTGPAGPPGFPGA<br>VGAKGEGGPQGPR |
| DGANGIPGIPPPGPR                          | AGAPGIPGGKGD SGAPGER    | AGPSGPSGLPGER                       |
| DGATGAAGPPGPTGPAGPPGFPGA<br>VGAK         | AGAPGLPGPR              | AGPSGPSGLPGERG                      |
| DGDPGLRGPPGLPGPL                         | AGAPGPPGPPGSDGSPGGK     | DGEAGAQPPGPAGPA<br>GER              |
| DGIPGQPLPGP                              | AGEDGHPGKPRPGE          | DGLNGLPGIPPPGPR                     |
| DGLPGLPGLP                               | AGEDGHPGKPRPGERG        | DGLNGLPGIPPPGPRG                    |
| DGRPGPIGP                                | AGEPGKAGER              | DGPRGPTGPIGPPGPA                    |
| DGRPGPIGPA                               | AGEPGRDGNPGSDGLPGR      | DKGEPGDKGPR                         |
| DGSPGAKGDRGETGPAGPPGAPGAP<br>GAPGPVGPAGK | AGFPGSPGAK              | DTEYFGTIGITPAQDF                    |
| DLGPRGPPGIPGREGPK                        | AGPAGAAGQPGAKGER        | EGPVGLPGIDGRPGPIGA                  |
| DLSFLPQPPQ                               | AGPAGPAGPAGPR           | ERGPPGNPLP                          |
| DLSFLPQPPQE                              | AGPAGPKGEPGSPGENGAPQMGR | EVGPRGLPGEPGP                       |
| DNIWDQGLVSQDL                            | AGPAGPPGPPGAIGPSGPAGK   | FGLPGPAGAR                          |
| DQGLVSQDLFS                              | AGPIGSAGPPGFPG          | FQGPGEPEPGASGPMG<br>PR              |
| DRGETGPAGPAGPIGPVG                       | AGPPGADGQPGA            | FRNVVDGQPF                          |
| DRGETGPAGPAGPIGPVGA                      | AGPPGADGQPGAK           | GAAGEPGKAGER                        |
| DTEYFGTIGITPAQD                          | AGPPGESGR               | GAAGLPGVAGAPGLPGP<br>R              |
| DTGSSNLWVPS                              | AGPPGPAGPAGPPGP         | GANGAPGIAGAPGFPGA<br>R              |
| DTVQVGGISDTNQIFG                         | AGPPGPPGPAGK            | GAPGDRGEPGPPGPAGF                   |
| EFGFDGDFYR                               | AGPPGPSGPPGEK           | GAPGPQGPVGPVGK                      |
| EFGFDGDFYRA                              | AGPTGPIGSR              | GAPGTAGPSGPSGLPGER                  |
| EGICKPGAP                                | AGPTGPIGSRG             | GARGEPPAGLPGPGE                     |
| EGPVGLPGIDGR                             | AGQPGAKGER              | GDGGPPGATGFPGAAG                    |
| EGPVGLPGIDGRPGPI                         | AGRPGEAGLPAGK           | GDRGETGPAGPAGPIGPV                  |

|                                       |                                    |                                     |
|---------------------------------------|------------------------------------|-------------------------------------|
| EGPVGLPGIDGRPGPIG                     | AGSPGKDGLNGLPGPIGPPGPR             | GDRGETGPAGPAGPIGPV<br>G             |
| EGPVGLPGIDGRPGPIGPAG                  | AIGFPGPK                           | GDRGETGPAGPAGPIGPV<br>GA            |
| EGPVGLPGIDGRPGPIGPAGA                 | AIGPSGPAGK                         | GDRGETGPAGPPGAPGA<br>PGAPGPVGPAG    |
| EGPVGLPGIDGRPGPIGPAGAR                | AKGDPPGR                           | GEPGNIGFPGPK                        |
| EGSPGLPGIPPPGVR                       | AKGEPGDAGAK                        | GEPGPAGAVGPAGAVGP<br>R              |
| EPGLGIAGPPGAR                         | ANGLPGEKGPPGDR                     | GEPGPAGLPGPP                        |
| ERGPPGPMGPPGLAGPPGESGR                | APGPKGAR                           | GEPGPAGLPGPPG                       |
| ETGPAGPAGPIGPV                        | AQGPPGPAGPAGER                     | GEPGPAGLPGPPGE                      |
| ETGPAGPAGPIGPVG                       | ARGEPGAGLPGPPGER                   | GEPGPAGLPGPPGER                     |
| ETGPAGPAGPIGPVGA                      | ARGPAGPQGPR                        | GEPGLGIAGPPGAR                      |
| FDGDFYR                               | ARGPPGPPGK                         | GEPGPTGIQPPGPAGEE<br>GK             |
| FDNIWDQGLVS                           | ARGPPGPPGTNGVPGQR                  | GEQGPAGSPGF                         |
| FDNIWDQGLVSQ                          | ARGPSGPQGSPGPPGPK                  | GERGPPGESGAAGPTGPI<br>GS            |
| FGFDGDFYR                             | ARGPSGPQGSPGPPGPKGNSGEPGAP<br>GSK  | GETGPAGPAGPIGPVG                    |
| FGFDGDFYRA                            | ARGSDGSVGPVGPA                     | GFPGADGVAGPK                        |
| FGTIGIGTPA                            | ARGSDGSVGPVGPAGP                   | GFPGADGVAGPKGPAGE                   |
| FGTIGIGTPAQD                          | ASGHPPGIPPPGPR                     | GFPGADGVAGPKGPAGE<br>R              |
| FLGLPGSR                              | ASGPAGPRGPPGSAGSPGK                | GFPGLPGPSGEPGK                      |
| FPGERGLPGA                            | ASGPAGPRGPPGSAGSPGKDG              | GFPGLPGPSGEPGKQ                     |
| FPGLPGPSGEPGK                         | ASGPMGPR                           | GFPGLPGPSGEPGKQGAP<br>GA            |
| FPGPKGANGEPGK                         | AVAGPPGPSGPPGEK                    | GFPGLPGPSGEPGKQGPS<br>GA            |
| FPGYPGPK                              | AVGPAGKDGEAG                       | GFPGLPGPSGEPGKQGPS<br>GASGER        |
| GAAGPPGPTGPAGPPGFPAGVGA               | AVGPAGKDGEAGAQ                     | GFQGPPEPGEPEGASGPM<br>GPR           |
| GAPGAIGAPGPAGANGDRGEAGPA<br>GPAGPAGPR | AVGQPPGPSGEEGK                     | GFSGLDGAK                           |
| GAPGFLGLPGSR                          | AVGSPGPAGPR                        | GFSGLDGAKGDAGPAGP<br>K              |
| GAPGFPGPK                             | DGAKGDAGPAGPK                      | GFSGLQGPPGPPGPSGEPQ<br>GPSGASGPAGPR |
| GAPGIAGAPGFPGAR                       | DGAKGDAGPAGPKGEPGSPGENGAP<br>GQMGR | GHGAGGASIL                          |
| GAVGPAGAVGPR                          | DGASGHPPGIPPPGPR                   | GHNGLDGL                            |
| GDAGPPGPAGPAGPPGPIG                   | DGEAGAQGPPGPAGPA                   | GIDGRPGPIGPA                        |
| GDGGPPGATGFPGAAGR                     | DGEAGAQGPPGPAGPAGE                 | GIPGPFGR                            |
| GDLGPRGPPGIPGREGPK                    | DGEAGAQGPPGPAGPAGERGEQGPA<br>GSPGF | GIRGPPGLP                           |
| GDGMPGLPGLKGDEGIQGLP                  | DGNPGSDGLPGR                       | GISVPGPMGPSGPR                      |

|                                                   |                                        |                                       |
|---------------------------------------------------|----------------------------------------|---------------------------------------|
| GDRGETGPAGPPGAPGAPGAPGPVG<br>PAGK                 | DGPRGPTGP                              | GLNGLPGPIGPPGPR                       |
| GDTGAKGEPGPTGIQGPPGPAGEEG<br>K                    | DGRPGPPGPPGAR                          | GLPGAKGAAGLPGVAGA<br>PGLPGPR          |
| GDVGPLGPLGKEGPPGPR                                | DGSPGAKGDR                             | GLPGLKGHNGLQGLPGL                     |
| GEIGPAGPPGPPGLR                                   | DGSPGAKGDRGETGPAGPPGAPGAP<br>GAPGPVGPA | GLPGLKGHNGLQGLPGL<br>A                |
| GENGVPGEDGAPGPMGPR                                | EAGPAGPAGPAPR                          | GLPGPIGPPGPR                          |
| GEPGPPGLDQP                                       | EGAPGAEGSPG                            | GLPGPPGAPGPQGF                        |
| GEPGPTGIQGPPGPAGEEGKR                             | EGAPGAEGSPGR                           | GLPGPPGAPGPQGFQGPP<br>GEPGEPGASGPMGPR |
| GETGPAGPAGPIGPV                                   | EGAPGAEGSPGRDGSPGA                     | GLPGVAGSVGEPGPLGIA<br>GPPGA           |
| GETGPAGPAGPIGPVGA                                 | EGAPGAEGSPGRDGSPGAK                    | GLPGVAGSVGEPGPLGIA<br>GPPGAR          |
| GETGPAGPAGPIGPVGAR                                | EGLRGPR                                | GLTGPIGPPGAPAGPDK                     |
| GETGPAGPPGAPGAPGAPGPVGPAG<br>K                    | EGPQGPVGVPVSPGER                       | GNDGATGAAGPPGPTGP<br>AGPPGFPGA V GAK  |
| GEVGFQGKTGPPGPPG                                  | EGSKGPRG                               | GPAGLPGPPGER                          |
| GEVGLPGLSGPVGPPGNPGANGLPG<br>AKGAAGLPGVAGAPGLPGPR | EPGSSGVDGAPGKDGPGRGPTGP<br>GPAGQPGDK   | GPIGPPGPR                             |
| GEVGPAGPNGF                                       | FAGPAGAAGQPGAKGER                      | GPPGEPGEPGASGPMGPR                    |
| GFDGDFYRA                                         | FAGPPGADGQPGAK                         | GPPGESGAAGPTGPIGS                     |
| GFDGLDFDWEYPSR                                    | FDNIWDQGLVSQDL                         | GPPGESGAAGPTGPIGSR                    |
| GFLLPASQIIPTAQ                                    | FLPQPPQEK                              | GPPGPMGPPG                            |
| GFMPSDR                                           | FSGLDGAK                               | GPPGPMGPPGL                           |
| GFPGLPGPS                                         | FSGLDGAKG                              | GPPGPMGPPGLAGPPGES<br>G               |
| GFPGPPPIGL                                        | FSGLDGAKGD                             | GPPGPMGPPGLAGPPGES<br>GR              |
| GFPGPPGPK                                         | GAAGEPGKAGE                            | GPPGPPGPPGPPGPPSG                     |
| GFPGSPGNIPAGK                                     | GAAGEPGKNGAK                           | GPPGPPGPPGPPGPPSGG<br>Y               |
| GFPGTPGLPGFK                                      | GAAGIPGGKGEK                           | GPPGPPGPPGPPGPPSGG<br>YD              |
| GFPGTPGLPGFKG                                     | GAAGIPGGKGEKGETGL                      | GPPGPSGLPGLP                          |
| GFPGTPGLPGFKGI                                    | GAAGLPGPK                              | GPPGSAGSPGKDGLNGLP<br>GPIGPPGPR       |
| GFPGTPGLPGFKGIR                                   | GAAGLPGPKGD                            | GPPGSAGSPGKDGLNGLP<br>GPIGPPGPRG      |
| GFPGYPGPK                                         | GAAGLPGPKGDR                           | GPSGPSGLPGER                          |
| GGGYEFGFDGDF                                      | GAAGLPGPKGDRGD                         | GPSGPSGLPGERG                         |
| GGGYEFGFDGDFYR                                    | GAAGLPGPKGDRGDAGPK                     | GPTGPIGPPGPA                          |
| GGISDTNQIF                                        | GAAGPTGPIGSR                           | GRTGDAGPAGPPGPPGPP<br>GPPGPPS         |
| GGISDTNQIFG                                       | GAAGQPGAKGER                           | GRTGDAGPAGPPGPPGPP<br>GPPGPPSG        |
| GGPGPMGLMGPR                                      | GADGAPGKDG                             | GSAGPPGATGFPGAAG                      |

|                                          |                                           |                                        |
|------------------------------------------|-------------------------------------------|----------------------------------------|
| GGYDLSFLPQPPQE                           | GADGAPGKDG V                              | GSAGPPGATGFPGAAGR                      |
| GGYEFGFDGDF                              | GADGAPGKDGVR                              | GSPGERGEVGPAGPNGF                      |
| GHPGPPGPVGPA                             | GADGAPGKDGVRG                             | GSVGEPLGLIAGPPGAR                      |
| GIDGRPGPIGP                              | GA KGDAGAPGAPGSQ GAGLQGM P<br>GER         | GVPGDLGAPGPSGAR                        |
| GIDGRPGPIGPAGA                           | GA KGE PGDAGAK                            | GVPGPPGAVGPAGK                         |
| GIPGEFGLPGPAGA                           | GANGAPGNDGAK                              | GVPGPPGAVGPAGKDGE<br>AGAQQPPGPAGPAGE   |
| GIPGEFGLPGPAGAR                          | GANGAPGNDGAKGDAGAPGAPGSQ<br>GAPGLQGM PGER | GVPGPPGAVGPAGKDGE<br>AGAQQPPGPAGPAGER  |
| GIPGEFGLPGPAGARGER                       | GANGDRGEAGPAGPAGPR                        | GVVGLPGQR                              |
| GIPGLPGPR                                | GAPGADGPAGAPG                             | HMWPGDIK                               |
| GIPGLPGPRG                               | GAPGADGPAGAPGTPGPQ                        | IDGRPGPIGP                             |
| GIPGPVGAAGATGAR                          | GAPGADGPAGAPGTPGPQG                       | IDGRPGPIGPA                            |
| GISVPGPMGPSGPRG                          | GAPGADGPAGAPGTPGPQGIAGQ                   | IGFPGPKGPSGDPGK                        |
| GIVGLPGQR                                | GAPGAIGAPGA                               | IGPAGPPGPPGLR                          |
| GLLGLPGQPG                               | GAPGAPGAPGPVGPA                           | ILGDVFIR                               |
| GLLGPKGPPGIPPPGV                         | GAPGAPGPVGPA                              | ISVPGPMGPSGPR                          |
| GLLGPKGPPGPPPGVTGM                       | GAPGAVGPAGPR                              | LNGLPGPIGPPGPR                         |
| GLPGADGRAGVMGPAGSR                       | GAPGDKGEAGPSGPAGPT                        | LPGPIGPPGPR                            |
| GLPGEMGRP                                | GAPGDRGEPPGPGA                            | LQGP GPPGSPGEQQPSG<br>ASGPAGPR         |
| GLPGLKGHNGLQGLPGLAGHHGDQ<br>GAPGAVGPAGPR | GAPGDRGEPPGPAG                            | LSFLPQPPQE                             |
| GLPGLPGEKGHT                             | GAPGEKGEGGPPGAAGPA                        | NGDDGEAGKPRPGER                        |
| GLPGLPGPK                                | GAPGFPGPR                                 | NGLPGPIGPPGPR                          |
| GLPGPAGPPGE                              | GAPGIPGCK                                 | PGADGVAGPK                             |
| GLPGPIGPKG                               | GAPGNDGAK                                 | PGFGLPGK                               |
| GLPGPIGPPGPRG                            | GAPGPAGPK                                 | PGPMGPSGPR                             |
| GLPGPLGPPGP                              | GAPGPAGPKGSPGEAGRPGEAGLPG<br>A            | QGLPGPAGPPGEAGKPGE<br>QGVPGDLGAPGPSGAR |
| GLPGPPGAP                                | GAPGPAGPKGSPGEAGRPGEAGLPG<br>AK           | QGPPGEPGEPGASGPMGP<br>R                |
| GLPGPPGAPGP                              | GAPGPAGPKGSPGEAGRPGEAGLPG<br>AKG          | RGEPGNIGFPGPK                          |
| GLPGTAGLPGMK                             | GAPGPAGSRGPPGPQGPR                        | RGETGPAGPAGPIGPV                       |
| GLPGVAGAPGLPGPR                          | GAPGPMGPR                                 | RGETGPAGPAGPIGPVGA                     |
| GLPGVAGSVGEPGPL                          | GAPGPQGPPGAPGP                            | RGPPGPMGPPGLAGPPGE<br>SGR              |
| GLPGVAGSVGEPGPLGI                        | GAPGPQGPPGAPGPL                           | SGATPVFDNIWDQGLVSQ<br>DL               |
| GLQGLPGLAGHHGDQGAPGAVGPAG<br>PR          | GAPGPQGPPGAPGPLG                          | SGDRGETGPAGPAGPIGP<br>V                |
| GLSGLPGPPGPPGPR                          | GAPGSKGDTGAK                              | SGDRGETGPAGPAGPIGP<br>VG               |
| GLTGPIGPPGPAGAPGDKGEAGPSGP<br>AGPT       | GAPPGE GPGEQK                             | SGDRGETGPAGPAGPIGP<br>VGA              |



|                                       |                                 |                                |
|---------------------------------------|---------------------------------|--------------------------------|
| GLTGPIGPPGPAGAPGDKGEAGPSGP<br>AGPTGA  | GARGEPPAGLPGPPGER               | SGLQGPPPGSPGEQGP<br>SGASGPAGPR |
| GLTGPIGPPGPAGAPGDKGEAGPSGP<br>AGPTGAR | GARGEPPAGLPGPPGERGGPGS          | SVPGPMGPSGPR                   |
| GNIGFPGPK                             | GASGHPGPIGPPGPR                 | TGDAGPAGPPGPPGPPGP<br>PGPPS    |
| GNPGQPQPGLP                           | GAVGQPGPPGPSGEEK                | TGISVPGPMGPSGPR                |
| GPAGLPGVPGR                           | GDAGAPGAPGSQGAPGLQGMPGER        | TGPPGPSGISGPPGPPGPA<br>GK      |
| GPAGPAGPIGP                           | GDAGPAGPK                       | VALRGPPGP                      |
| GPAGPAGPIGPV                          | GDAGPAGPKGEPGSPGENGAPGQMG<br>PR | VGGISDTNQIF                    |
| GPAGPAGPIGPVG                         | GDAGPPGPAGPA                    | VPGPMGPSGPR                    |
| GPAGPAGPIGPVGA                        | GDAGPPGPAGPAGPPGP               |                                |
| GPAGPIGPV                             | GDAGPPGPAGPAGPPGPI              |                                |
| GPAGPIGPVG                            | GDAGPPGPAGPAGPPGPIGN            |                                |
| GPAGPIGPVGA                           | GDIGSPGRDGA                     |                                |
| GPAGPPGLLGP                           | GDKGEPGDKGPR                    |                                |
| GPAGPPGLLGPPGPR                       | GDKGEPGSSGVDGAPGK               |                                |
| GPAGPPGLLGPPGPRG                      | GDKGEPGSSGVDGAPGKDGPR           |                                |
| GPAGPPGPPGLR                          | GDKGEQGPPGPTGPQGPIG             |                                |
| GPAGPPGPPGLRG                         | GDKGETGEQGDR                    |                                |
| GPMPGLMGPR                            | GDKGETGEQGDRG                   |                                |
| GPIGFPGPK                             | GDQGAPGAVGPAGPR                 |                                |
| GPIGPPGIP                             | GDRGDAGPK                       |                                |
| GPIGPPGIPGPK                          | GDRGDAGPKGADGAPGKDG             |                                |
| GPIGPPGPRG                            | GDRGEAGPA                       |                                |
| GPIGPPGRP                             | GDRGEAGPAGPA                    |                                |
| GPMGLMGPR                             | GDRGEAGPAGPAGPR                 |                                |
| GPPGAPGLPG                            | GDRGENSPGAPGAPGHPGPPGPVG<br>PA  |                                |
| GPPGAPGLPGQ                           | GDRGETGPAGPA                    |                                |
| GPPGAPGLPGI                           | GDRGETGPAGPAGPIGP               |                                |
| GPPGASGAPGPQGF                        | GDRGETGPAGPPGAP                 |                                |
| GPPGEPGEPGA                           | GDRGETGPAGPPGAPGAPGAPG<br>PA    |                                |
| GPPGFGLPGK                            | GDRGETGPAGPSGAPGPAGSR           |                                |
| GPPGFPGPK                             | GDSGAPGERGPPGAGGPPGPR           |                                |
| GPPGFQGLP                             | GDSGAPGERGPPGAGGPPGPRG          |                                |
| GPPGHPGLP                             | GDSGPPGER                       |                                |
| GPPGLLGPPGPR                          | GDSGPPGERGAPGPQG                |                                |
| GPPGLPGLPGFK                          | GDSGRPGEPGLMGPR                 |                                |
| GPPGLPPRVVGASP                        | GEAGAPGIPGGK                    |                                |
| GPPGPPGFPGPK                          | GEAGAPGIPGGKGDGAPGER            |                                |
| GPPGPPGLPGPK                          | GEAGAPGIPGGKGDGAPGERGPPG        |                                |

|                                       |                                       |  |
|---------------------------------------|---------------------------------------|--|
| GPPGPPGPPGPK                          | GEAGAPGIPGGKGDSGAPGERGPPGA<br>GGPPGPR |  |
| GPPGPPGPPGPPGLR                       | GEAGAQGPPGPAGPAGER                    |  |
| GPPGPPGPPGPPGPPS                      | GEAGKPGER                             |  |
| GPPGPPGPPGPPGPPSGGYDL                 | GEAGPAGPAGPAGPR                       |  |
| GPPGPTGPAGPPGFPG                      | GEAGSPGIAGPK                          |  |
| GPPGQPGLP                             | GEDGKDGSPGEPGANGLPG                   |  |
| GPSPGQPGSPGPPGP                       | GELGPVGNPGPAGPAGPR                    |  |
| GPTGLPGPAGPPGL                        | GENGPVGPTGPVGAAGPSGPNGPPG<br>PAGSR    |  |
| GPTGPIGPPGP                           | GEPGAKGER                             |  |
| GPTGPIGPPGPAG                         | GEPGAVGQPGPPGPSGEEGK                  |  |
| GPVGPAGPIG                            | GEPGDAGAK                             |  |
| GPVGPTGPVGAAGPSGPNGPPGPAG<br>SR       | GEPGPAGLPGPPGERGGPGS                  |  |
| GRPGAPGPAGAR                          | GEPGPPGQP                             |  |
| GRPGLPGPI                             | GEPGPQGH                              |  |
| GSDGSVGPVGPAGPI                       | GEPGPRGPPGA                           |  |
| GSDGSVGPVGPAGPIG                      | GEPGRDGNPGSDGLPGR                     |  |
| GSDGSVGPVGPAGPIGSAGPPG                | GEPGSPGENGAPGQMGR                     |  |
| GSDGSVGPVGPAGPIGSAGPPGF               | GEQGPAGPPGFQ                          |  |
| GSDGSVGPVGPAGPIGSAGPPGFPGA<br>PGPK    | GEQGPPGPAGFPGAPQNGEPGAK               |  |
| GSDGSVGPVGPAGPIGSAGPPGFPGA<br>PGPKGEL | GEQGPSGASGPAGPR                       |  |
| GSTGEIGPAGPPGPPGL                     | GERGEAGSPGIAGPK                       |  |
| GSTGEIGPAGPPGPPGLR                    | GERGPPGESG                            |  |
| GSVGPVGPAGPIGSAGPPGFPGAPGP<br>K       | GERGPPGESGAAGPT                       |  |
| GTAGPSGPSGLPGER                       | GERGPPGESGAAGPTGPIG                   |  |
| GTGSMTGILGYDTVQVGGI                   | GERGPPGESGAAGPTGPIGR                  |  |
| GTGSMTGILGYDTVQVGGISDTNQ              | GERGPPGNPGLP                          |  |
| GTGSMTGILGYDTVQVGGISDTNQIF<br>G       | GERGSPGGP                             |  |
| GVDGLPGQPGPR                          | GESGAPGVPGIAGPR                       |  |
| GVMGFPGPK                             | GESGNKGEPGAVGQPGPPGPSGEEGK            |  |
| GVMQGPMPGPMGR                         | GETGAPGLKGENGVPGENGAPGPMG<br>PR       |  |
| GVPGPPGAVGPAGKDGEA                    | GETGPAGPPG                            |  |
| GYDLSFLPQPPQ                          | GETGPAGPPGAPGAPGAPGVGPA               |  |
| GYDTVQVGGI                            | GETGPAGPSGAPGPAGSR                    |  |
| GYPGNAGPVGAAGAPGPQGPPVGPV<br>GK       | GETGPAGRPGEVGPPGPPGPA                 |  |
| IAGAPGFPGAR                           | GETGPQGPPGPTGPSGDKGD                  |  |
| IDGRPGPIGPAG                          | GEVGAPGDPG                            |  |

|                                           |                                         |  |
|-------------------------------------------|-----------------------------------------|--|
| IGQPGAVGPAGI                              | GEVGPAGPNGFAGPAGAAGQPGAK<br>GE          |  |
| IGQPGAVGPAGIR                             | GEVGPAGPNGFAGPAGAAGQPGAK<br>GER         |  |
| IGQPGAVGPAGIRG                            | GEVGPRGLPGEPGP                          |  |
| ILGDVFIRQ                                 | GFMPSDRA                                |  |
| ILGDVFIRQY                                | GFPGAPGQNGEPGAK                         |  |
| ILGPPGPR                                  | GFPGLPGPSGEPGKQGAPG                     |  |
| IPGLPGVPGPRGP                             | GFPGLPGPSGEPGKQGAPGAS                   |  |
| ISGPSGPIGPPGIPGPK                         | GFPGLPGPSGEPGKQGPGS                     |  |
| ISVPGPMGPGSPRG                            | GFPGLPGPSGEPGKQGPGSG                    |  |
| KGEPGVVGAPGTAGPSGPSGLPGER                 | GFPGLPGPSGEPGKQGPGSGAS                  |  |
| KNWGEGW                                   | GFPGLPGPSGEPGKQGPGSGASGE                |  |
| LDTEYFGTIGITPAQDF                         | GFPGNPGAPGSPGPA                         |  |
| LGAPGFLGLPGSR                             | GFPGNPGAPGSPGPAGH                       |  |
| LGFPGER                                   | GFPGNPGAPGSPGPAGHQGAVGSPG<br>PAGPR      |  |
| LGPLGAPGEDGRPGPPGSGI                      | GFPGPKGAAGEPGKAGER                      |  |
| LGSLSPLGLPLGPPG                           | GFPGPPGMKGPA                            |  |
| LGVPLPGYPGR                               | GFPGSPGAK                               |  |
| LPASQIIPTAQ                               | GFSGLDGAKGD                             |  |
| LPGDRGPPGPPGI                             | GFSGLDGAKGDAGPAGPKGEPGSPGE<br>NGAPGQMGR |  |
| LPGLPGPK                                  | GGAGPPGPEGGK                            |  |
| LTGPIGPPGAPAGPDKGEAGPSGPA<br>GPTGAR       | GGPGERGEQGPPGPA                         |  |
| MGFPGPK                                   | GGPGERGEQGPPGPAGFPGAPQNG<br>EPGAK       |  |
| MGIKGHRGFPGNPGAPGSPGPAGHQ<br>GAVGSPGPAGPR | GGPGERGEQGPPGPAGFPGAPQNG<br>EPGAKGE     |  |
| MGPPGEPGLPG                               | GGPGGPGPKGDKGEPGSSGVDGAPG<br>K          |  |
| MMGPPGPPGPLGIPGR                          | GGPGGPGPQGPAG                           |  |
| MQGPMGPMGR                                | GGPGGPGPQGPAK                           |  |
| MWPGDIK                                   | GGPGPAGPR                               |  |
| PAGPAGPIGPV                               | GGPSRGFPADGVAGPK                        |  |
| PAGPAGPIGPVG                              | GGQGPPGSPGPK                            |  |
| PAGPAGPIGPVGA                             | GHNGLDGLKGQPGAPGVKGEPGAPG<br>ENGTPGQTGA |  |
| PAGPPGLLGPPGPR                            | GHNGLQGLPGLAGH                          |  |
| PGADGVAGPKGPAGER                          | GHPGPIGPPGPR                            |  |
| PGAPGFPGPK                                | GIAGPPGAR                               |  |
| PGEPEGVSGPMGR                             | GIPGPVGEQGLPGAP                         |  |
| PGEPPGQPIGVP                              | GIQGPPGPAGEEGK                          |  |
| PGFPGLPGK                                 | GISGPPGPPGPAGK                          |  |
| PGGPPGLPGPAGPKGAK                         | GIVGLPQQRGE                             |  |

|                                                      |                                  |  |
|------------------------------------------------------|----------------------------------|--|
| PGLAGSPGLPGIHGLQ                                     | GKDGEAGAQ                        |  |
| PGLHGLPGEKGDPPGFDVSGPPGE<br>RGSPGIPGAPGPMGPPGSPGLPGK | GKEGSKGPR                        |  |
| PGLPGGQGPPGSPGPKGSPGFPGIPGP<br>PGQPGPR               | GKSGDRGETGPAGPA                  |  |
| PGPMGLMGPR                                           | GKSGDRGETGPAGPAGP                |  |
| PGPPGPPGPPGLR                                        | GKSGDRGETGPAGPAGPIGP             |  |
| PGPQGPPGL                                            | GKSGDRGETGPAGPAGPIGPV            |  |
| PGPQGPPGLA                                           | GKSGDRGETGPAGPAGPIGPVG           |  |
| PGPSGISGPPGPPGAGKEGLR                                | GKSGDRGETGPAGPAGPIGPVGA          |  |
| PGPVGAAGATGAR                                        | GLAGPAGPQ                        |  |
| PGTPGLPGFKGIR                                        | GLAGPPGESGR                      |  |
| PGVVGAPGTAGPSGSPGLPGER                               | GLMPGSPVGPVGPR                   |  |
| PIGFPGPK                                             | GLPGAAGER                        |  |
| PMGLMGPR                                             | GLPGADGR                         |  |
| PPGFGLPGK                                            | GLPGADGRA                        |  |
| PPGLLGPPGPR                                          | GLPGADGRAG                       |  |
| PQGLPGLPGEF                                          | GLPGADGRAGVM                     |  |
| PTGFPGPK                                             | GLPGAPGPR                        |  |
| PVFDNIWDQGLVS                                        | GLPGEKGPPGDR                     |  |
| QGPSGASGERGPPGPMGPPGL                                | GLPGEKGPPGDRGGPGPAGPR            |  |
| QGPSGASGERGPPGPMGPPGLAGPP<br>GESGR                   | GLPGEPPGPR                       |  |
| QVGGISDTNQIF                                         | GLPGGGPPGLGLPGPKG                |  |
| QVIGGEGPLPGQKGDPPGPPGSR                              | GLPGLKGH                         |  |
| RGEPPAGAVGPAGAVGPR                                   | GLPGLKGHNGL                      |  |
| RGETGPAGPAGPIGPV                                     | GLPGLKGHNGLQGLPG                 |  |
| RGETGPAGPAGPIGPVGAR                                  | GLPGLKGHNGLQGLPGLAG              |  |
| RGETGPAGPPGAPGAPGAPGVGPA<br>GK                       | GLPGLKGHNGLQGLPGLAGH             |  |
| RGPVGPAGP                                            | GLPGPKGDR                        |  |
| RGSTGEIGPAGPPGPPGL                                   | GLPGPKGDRGDAGPK                  |  |
| RGSTGEIGPAGPPGPPGLR                                  | GLPGPPGAPGPQ                     |  |
| RNVVDGQPF                                            | GLPGPPGAPGPQG                    |  |
| RPGPPGPPGPK                                          | GLPGPPGER                        |  |
| SAGPPGFPGAPGPK                                       | GLPGPRGPQ                        |  |
| SGATPVFDNIWDQGLV                                     | GLPGPSGEPPGK                     |  |
| SGDRGETGPAGPAGPIG                                    | GLPGQPGIPGE                      |  |
| SGDRGETGPAGPAGPIGPVGAR                               | GLPGTSGPPGENGKPGEPGPK            |  |
| SGETGASGPPGF                                         | GLQGPPGPPGSPGEGQGPSGASGPAGP<br>R |  |
| STGISVPGPMGSPGPR                                     | GLTGPIGPPGPA                     |  |
| SVGPVGPAGPIGSAGPPGFPGAPGPK                           | GLTGSPGSPGPDG                    |  |
| TAGPSGSPGLPGER                                       | GLTGSPGSPGPDGK                   |  |

|                                     |                                                        |  |
|-------------------------------------|--------------------------------------------------------|--|
| TAILPGLGR                           | GLVGEPGPAGSK                                           |  |
| TGPAGPAGPIGPV                       | GNAGPPGPPGPAGK                                         |  |
| TGPAGPAGPIGPVG                      | GNDGATGAAGPPGPTGPAGPPGF                                |  |
| TGPAGPAGPIGPVGAR                    | GNPGPAGPAGPR                                           |  |
| TGPIGPPGPAGAPGDKGEAGPSGPA<br>GPTGAR | GNPGSDGLPGR                                            |  |
| TGPPGPSGISGPPGPPGPAGKEGL            | GNSGEPGAPGSK                                           |  |
| TVQVGGISDTNQIF                      | GNSGEPGAPGSKGDTGAK                                     |  |
| VGEPGPLGIAGPPGAR                    | GPAGANGLPGEK                                           |  |
| VGGISDTNQI                          | GPAGAPGTPGPQ                                           |  |
| VGGISDTNQIFG                        | GPAGAPGTPGPQG                                          |  |
| VGLMPGSVGPVGPR                      | GPAGPAGPAGPR                                           |  |
| VMGFPGPK                            | GPAGPAGPR                                              |  |
| VPGEDGAPGPMGPR                      | GPAGPPGLPGSVGAPGPR                                     |  |
| VPGLPGYPGR                          | GPAGPPGPAGE                                            |  |
| VPGPMGPSGPRG                        | GPAGPPGPIGN                                            |  |
| VPVVTGIR                            | GPAGPPGPR                                              |  |
| VVGGEDARPNSWPWQ                     | GPAGPQGPR                                              |  |
| WGFMPSDRA                           | GPAGPQGPRGD                                            |  |
| YDLSFLPQPPQE                        | GPAGPQGPRGDKGETGEQ                                     |  |
| YEFGFDGDFYRA                        | GPAGPQGPRGDKGETGEQGD                                   |  |
|                                     | GPAGPQGPRGDKGETGEQGDR                                  |  |
|                                     | GPAGPSGPAGK                                            |  |
|                                     | GPAGPSGPAGKDG                                          |  |
|                                     | GPAGPSGPAGKDGR                                         |  |
|                                     | GPAGSRGATGPAGV                                         |  |
|                                     | GPAPGAADGGPQ                                           |  |
|                                     | GPEGLPGPQGPK                                           |  |
|                                     | GPIGPPGRA                                              |  |
|                                     | GPKGENGVPVGPTGPV                                       |  |
|                                     | GPKGENGVPVGPTGPVG                                      |  |
|                                     | GPKGENGVPVGPTGPVGAAGPSGPNG<br>PPGPAGS                  |  |
|                                     | GPKGENGVPVGPTGPVGAAGPSGPNG<br>PPGPAGSRGDGGPPGATGFPGAAG |  |
|                                     | GPKGPPGPPGL                                            |  |
|                                     | GPKGPPGPPGP                                            |  |
|                                     | GPNGDSGRPGEPGLM                                        |  |
|                                     | GPPGAGGPPGPR                                           |  |
|                                     | GPPGAGGPPGPRG                                          |  |
|                                     | GPPGDPGLPG                                             |  |
|                                     | GPPGDRGGPGPAGPRG                                       |  |
|                                     | GPPGEPLPG                                              |  |
|                                     | GPPGFPGAPGPK                                           |  |

|  |                            |  |
|--|----------------------------|--|
|  | GPPGKDGASGHPGPIGPPGPR      |  |
|  | GPPGLAGPPGE                |  |
|  | GPPGLAGPPGESGR             |  |
|  | GPPGPAGEEGK                |  |
|  | GPPGPAGPAGER               |  |
|  | GPPGPAGPAGERGEQGPA         |  |
|  | GPPGPAGPR                  |  |
|  | GPPGPEGPR                  |  |
|  | GPPGPMGPPGLA               |  |
|  | GPPGPMGPPGLAGPPGESGRE      |  |
|  | GPPGPPGAIGPSGPAGK          |  |
|  | GPPGPPGIR                  |  |
|  | GPPGPPGKR                  |  |
|  | GPPGPPGLPG                 |  |
|  | GPPGPPGLR                  |  |
|  | GPPGPPGPAALPGSK            |  |
|  | GPPGPPGPAGK                |  |
|  | GPPGPQGLPGLAG              |  |
|  | GPPGPQGPR                  |  |
|  | GPPGPSGEAGPPGPPGK          |  |
|  | GPPGPVGPPG                 |  |
|  | GPPGPVGPPGLKGD             |  |
|  | GPPGQPGLPG                 |  |
|  | GPPGSAGSPGK                |  |
|  | GPPGSAGSPGKDG              |  |
|  | GPPGSAGSPGKDGL             |  |
|  | GPRGPPGPAGA                |  |
|  | GPSGDPGKAGEK               |  |
|  | GPSGDPGKAGEKGH             |  |
|  | GPSGEPGTAGPPGTPGPQG        |  |
|  | GPSGLPGER                  |  |
|  | GPSGLPGERG                 |  |
|  | GPSGPNGPPGPAGSR            |  |
|  | GPSGPDPGDNKGEPG            |  |
|  | GPSGPDPGDNKGEPGV           |  |
|  | GPSGPDPGDNKGEPGVVGAPG      |  |
|  | GPSGPDPGDNKGEPGVVGAPGTAG   |  |
|  | PSGPSGLPGERG               |  |
|  | GPSGPQGIR                  |  |
|  | GPSGPQGSPGPPGPK            |  |
|  | GPSGPQGSPGPPGPKGN          |  |
|  | GPSGPQGSPGPPGPKGNSGEFGAPGS |  |
|  | K                          |  |

|  |                                      |  |
|--|--------------------------------------|--|
|  | GPTGPIGPPGPAGQPGD                    |  |
|  | GPTGPIGPPGPAGQPGDKG                  |  |
|  | GPVGNPGPAGPAGPR                      |  |
|  | GPVGPSGPPGK                          |  |
|  | GPVGPSGPPGKD                         |  |
|  | GPVGPSGPPGKD GAS                     |  |
|  | GPVGPSGPPGKD GASGHPGP                |  |
|  | GPVGPSGPPGKD GASGHPGPIGPPGP<br>R     |  |
|  | GPVGPTGPVG                           |  |
|  | GPVGPTGPVGA                          |  |
|  | GPVGPTGPVGAA                         |  |
|  | GQAGVMGFPGPK                         |  |
|  | GQPGAKGER                            |  |
|  | GQPGPPGPPGTAGFPGSPGAK                |  |
|  | GQPGVMGFPGPK                         |  |
|  | GRPGAPGPA                            |  |
|  | GRPGAPGPAGA                          |  |
|  | GRPGEVGPPGPPGPAGEK                   |  |
|  | GRPGLPGAAGA                          |  |
|  | GRPGPIGPAGA                          |  |
|  | GRPGPPGPPG                           |  |
|  | GRTGDAGPAGPPGPPGPPGPPSG<br>GYD       |  |
|  | GRVGAPGPA                            |  |
|  | GRVGAPGPAGA                          |  |
|  | GSDGQPGPPGPPGTAGFPGSPGAK             |  |
|  | GSDGSVGPVGPA                         |  |
|  | GSDGSVGPVGPAGP                       |  |
|  | GSEGPQGVR                            |  |
|  | GSEGPQGVREGPPGP                      |  |
|  | GSEGPQGVREGPPGPAGA                   |  |
|  | GSPGEAGRPGE                          |  |
|  | GSPGEAGRPGEAGLP                      |  |
|  | GSPGEAGRPGEAGLPG                     |  |
|  | GSPGEAGRPGEAGLPGA                    |  |
|  | GSPGEAGRPGEAGLPGAK                   |  |
|  | GSPGEAGRPGEAGLPGAKG                  |  |
|  | GSPGERGEVPAGPNG                      |  |
|  | GSPGERGEVPAGPNGFAGPAGAAG<br>QPGAKGE  |  |
|  | GSPGERGEVPAGPNGFAGPAGAAG<br>QPGAKGER |  |
|  | GSPGGPGAAGFPGGR                      |  |

|  |                                           |  |
|--|-------------------------------------------|--|
|  | GSPGPMGPR                                 |  |
|  | GSPGPQGPPGSIGPQ                           |  |
|  | GSPGRDGSPGAK                              |  |
|  | GSPGSPGPDGK                               |  |
|  | GSQGSQGPAGPPGPPGPPGPPGPPSGG<br>GY         |  |
|  | GSTGEIGPAGPPGPPG                          |  |
|  | GTKGPKGENGPVGPT                           |  |
|  | GTKGPKGENGPVGPTGPVG                       |  |
|  | GTKGPKGENGPVGPTGPVGA                      |  |
|  | GTKGPKGENGPVGPTGPVGAA                     |  |
|  | GTKGPKGENGPVGPTGPVGAAAGPSG<br>PNGPPGPAGSR |  |
|  | GVAGAPGLPGPR                              |  |
|  | GVAGEPGRDGLPGGP                           |  |
|  | GVAGEPGRDGLPGGPG                          |  |
|  | GVAGEPGRDGLPGGPGL                         |  |
|  | GVAGPKGPAGER                              |  |
|  | GVDGAPGKDGP                               |  |
|  | GVKGDVGLPGP                               |  |
|  | GVPGEDGAPGPMGPR                           |  |
|  | GVPGEKGPIG                                |  |
|  | GVPGPPGAVGPAGKD                           |  |
|  | GVQGPPGPAGPR                              |  |
|  | GVVGLPGQRGE                               |  |
|  | GVVGLPGQRGER                              |  |
|  | GVVGPQGAR                                 |  |
|  | HGNRGEPPAGAVGPAGA                         |  |
|  | HGNRGEPPAGAVGPAGAVGPR                     |  |
|  | HMWPGDIKA                                 |  |
|  | HPGPIGPPGPR                               |  |
|  | IDGRPGPI                                  |  |
|  | IGFPGPKGPSGDPGKAGEK                       |  |
|  | IGPAGLPGPR                                |  |
|  | IGPPGDPGR                                 |  |
|  | IGPPGPAGAPGDK                             |  |
|  | IGPSGPAGK                                 |  |
|  | IGPSGPAGKD                                |  |
|  | IPGIGKPGQDGIPGQPGFPGGK                    |  |
|  | IQGPPGPAGE                                |  |
|  | IQGPPGPAGEEGK                             |  |
|  | IQGPPGPAGEEGKR                            |  |
|  | ISGPKGDSGPPGER                            |  |



|  |                                            |  |
|--|--------------------------------------------|--|
|  | ISGPPGPPGPAGK                              |  |
|  | KAGPPGPK                                   |  |
|  | KGENGVPGEDGAPGPMGPR                        |  |
|  | KGENGVPGENGAPGPMGPR                        |  |
|  | KGEPGDKGPR                                 |  |
|  | KGEPGSSGVDGAPGKDGPR                        |  |
|  | LAGPPGESGR                                 |  |
|  | LDGAKGDAGPA                                |  |
|  | LDGAKGDAGPAGPK                             |  |
|  | LGAPGPSGAR                                 |  |
|  | LGPVGNPGPAGPAGPR                           |  |
|  | LKGENGVPGEDGAPGPMGPR                       |  |
|  | LKGENGVPGENGAPGPMGPR                       |  |
|  | LQGLPGTSGPPGENGKPGEPGPK                    |  |
|  | LRGIPGSPGGPGSDGKPGPPGSQGETG<br>RPGPPGSPGPR |  |
|  | LSGPVGPPGNPGANGLPGAK                       |  |
|  | LTGSPGSPGPDGK                              |  |
|  | LVGEPGPAGSK                                |  |
|  | NAGPPGPPGPAGK                              |  |
|  | NGDDGEAGKPGRPGE                            |  |
|  | NGDDGEAGKPGRPGERGPPGPQG                    |  |
|  | NGDDGEAGKPGRPGERGPPGPQGA                   |  |
|  | NGEKGETGAPGLKGENGVPGENGAP<br>GPMGPR        |  |
|  | NGETGPQGPPGPTGPSGDKGDTGPPG<br>PQG          |  |
|  | NGVPGEDGAPGPMGPR                           |  |
|  | NGVPGENGAPGPMGPR                           |  |
|  | PAGLPGPGER                                 |  |
|  | PAGPQGPR                                   |  |
|  | PGAPGPPGKR                                 |  |
|  | PGAPGTPGER                                 |  |
|  | PGAVGPLGPR                                 |  |
|  | PGEAGEPGLPG                                |  |
|  | PGEKGPPGDR                                 |  |
|  | PGGPPGLPGPAGPK                             |  |
|  | PGLLGPPGPR                                 |  |
|  | PGLPGPSGEPGK                               |  |
|  | PGLPGPSGEPGKQGPPSGA                        |  |
|  | PGLPGPSGEPGKQGPPSGASGER                    |  |
|  | PGPAGPAGPR                                 |  |
|  | PGPIGPAGAR                                 |  |
|  | PGPIGPPGPR                                 |  |

|  |                                           |  |
|--|-------------------------------------------|--|
|  | PGSDGLPGR                                 |  |
|  | PGSDGLPGRD                                |  |
|  | PGSDGLPGRDGAPG                            |  |
|  | PPGARGPPGDTGKDGPR                         |  |
|  | PPGFDVSGPPGERGSPGIPGAPGPMGP<br>PGSPGLPGK  |  |
|  | PSGPQGPPSGPPGPK                           |  |
|  | PVGNPGPAGPAGPR                            |  |
|  | QGAVGSPGPAGPR                             |  |
|  | QGLPGPAGTAGE                              |  |
|  | QGLPGTSGPPGENGKPGEPGPK                    |  |
|  | QGLPGTSGPPGENGKPGEPGPKGEAG<br>APGIPGCK    |  |
|  | QGMPPER                                   |  |
|  | QGPPGPAGEEGK                              |  |
|  | QGPPGPPGSPGEQGPSGASGPAGPR                 |  |
|  | QGPSGASGERGPPGPMGPPG                      |  |
|  | QGVPGDPGAVGPLGPR                          |  |
|  | QPGLPGPR                                  |  |
|  | RGAAGLPGPK                                |  |
|  | RGEAGSPGIAGPK                             |  |
|  | RGEPGPAGLPGPPER                           |  |
|  | RGETGPAGPAGP                              |  |
|  | RGETGPAGPPGAPGAPGAPGPVGPA                 |  |
|  | RGETGPAGPSGAPGPAGSR                       |  |
|  | RGFPPER                                   |  |
|  | RGFPGLPGPSGEPGK                           |  |
|  | RGIGTPGPKR                                |  |
|  | RGIPGSPGGPGSDGKPGPPGSQGETGR<br>PGPPGSPGPR |  |
|  | RGAPGQGPR                                 |  |
|  | RGPLGPPG                                  |  |
|  | RGNNGDSGRPGEPGLMGPR                       |  |
|  | RGPPGAGGPPGPR                             |  |
|  | RGPPGESGAAGPTGPIGSR                       |  |
|  | RGPPGPPGK                                 |  |
|  | RGPPGPPGPR                                |  |
|  | RGPPGPQGPR                                |  |
|  | RGPSGPQGPPSGPPGPK                         |  |
|  | RGVPGPPGAVGPA                             |  |
|  | RGVQGPPGPAGPR                             |  |
|  | SAGIPGPFGR                                |  |
|  | SFLPQQPEK                                 |  |
|  | SGAAGPTGPIGS                              |  |

|  |                                         |  |
|--|-----------------------------------------|--|
|  | SGAAGPTGPIGSR                           |  |
|  | SGAPGVPGIAGPR                           |  |
|  | SGDRGETGPAGPA                           |  |
|  | SGDRGETGPAGPAGPI                        |  |
|  | SGDRGETGPAGPAGPIGP                      |  |
|  | SGDRGETGPAGPS                           |  |
|  | SGDRGETGPAGPSGAPGPA                     |  |
|  | SGDRGETGPAGPSGAPGPAGS                   |  |
|  | SGDRGETGPAGPSGAPGPAGSR                  |  |
|  | SCEPGAPGSKGDTGAK                        |  |
|  | SGHPGPIGPPGPR                           |  |
|  | SGLDGAKGDAGPAGPK                        |  |
|  | SGLDGAKGDAGPAGPKGEFGSPGEN<br>GAPGQMGP   |  |
|  | SGPAGPRGPPGSAGSPGK                      |  |
|  | SGPAGPRGPPGSAGSPGKDGLNGLPG<br>PIGPPGPR  |  |
|  | SGRPGEPGLMGPR                           |  |
|  | SPGPQGPPGSIGPQ                          |  |
|  | STPVPGPLPGPPGPPGR                       |  |
|  | TAGFPGSPGAK                             |  |
|  | TAGPSGPSGLPGERG                         |  |
|  | TGDAGPAGPPGPPGPPGPPSG                   |  |
|  | TGDAGPAGPPGPPGPPGPPSGGY<br>D            |  |
|  | TGPPGPAGQDGRPGPPGPPG                    |  |
|  | TGPPGPAGQDGRPGPPGPPGA                   |  |
|  | TGSPGSPGPDGK                            |  |
|  | VAGAPGLPGPR                             |  |
|  | VAGEPGRDGLPGGPG                         |  |
|  | VAGPKGPAGE                              |  |
|  | VAGPKGPAGER                             |  |
|  | VAGPPGPSGPPGEK                          |  |
|  | VDGAPGKDGPR                             |  |
|  | VGAPGPAGAR                              |  |
|  | VGEPGPAGSK                              |  |
|  | VGEPGPAGSKGESGNKGEPGAVGQP<br>GPPGPSGEEK |  |
|  | VGNPGPAGPAGPR                           |  |
|  | VGPAVAGPR                               |  |
|  | VGPAKDGEGAGAQ                           |  |
|  | VGPPGPPGPAGEK                           |  |
|  | VGPPGPSGN                               |  |
|  | VGPPGPSGNAGPPGPPGPAGK                   |  |

|  |                        |  |
|--|------------------------|--|
|  | VGPPGPSGNAGPPGPPGPAGKE |  |
|  | VGPSGPPGKD             |  |
|  | VGQPGPPGPSGEEGK        |  |
|  | VGSPGPAGPR             |  |
|  | VQGPPGPAGPR            |  |
|  | VQGPPGPAGPRG           |  |
|  | VVGAPGTAGPSGSLPGER     |  |
|  | VVGLPGQR               |  |
|  | VVGLPGQRGER            |  |

**Table S3.** DPPH and FRAP for CH-GL and CH-OPT at times 0, 8, 16 and 24 h for each colonic region.

| Time (h)                | CH-GL       |               | CH-OPT      |              |
|-------------------------|-------------|---------------|-------------|--------------|
|                         | DPPH        | FRAP          | DPPH        | FRAP         |
| <b>Ascending colon</b>  |             |               |             |              |
| 0                       | 24.00±6.05  | 440.82±270.11 | 17.53±0.68  | 273.39±2.49  |
| 8                       | 24.05±2.05  | 392.93±92.98  | 18.63±2.03  | 315.14±56.17 |
| 16                      | 27.68±2.63  | 454.30±50.21  | 28.25±0.85* | 370.81±43.24 |
| 24                      | 29.10±1.20  | 424.08±28.36  | 26.88±1.28* | 390.69±73.07 |
| <b>Transverse colon</b> |             |               |             |              |
| 0                       | 20.65±8.75  | 431.06±247.33 | 15.40±0.45  | 236.11±55.67 |
| 8                       | 21.20±3.85  | 392.00±40.91  | 21.58±3.93  | 255.00±31.81 |
| 16                      | 24.08±0.43  | 328.78±74.38  | 16.13±1.28  | 297.74±1.99  |
| 24                      | 17.55±4.25  | 292.52±66.95  | 23.73±0.03  | 323.09±55.17 |
| <b>Descending colon</b> |             |               |             |              |
| 0                       | 29.35±9.85  | 520.32±304.04 | 22.50±1.10  | 245.05±26.84 |
| 8                       | 24.25±11.45 | 699.77±99.49  | 19.98±0.43  | 170.49±39.77 |
| 16                      | 28.28±9.43  | 309.25±110.65 | 21.15±0.50  | 247.54±42.25 |
| 24                      | 20.68±3.73  | 492.42±71.59  | 19.55±0.01  | 278.36±23.36 |

Values are expressed as mean ± SEM in mM. DPPH is reported in mM Trolox Eq. FRAP is reported in μM ascorbic acid equivalents. Within a column, \* symbol indicates significant differences from control (Time 0 h) (p<0.05).
